# Supplementary material for: Relationship between cold pressor pain-sensitivity and sleep quality in opioid-dependent males on methadone treatment
Source: PeerJ. 2015 Apr 9;3:e839. doi: 10.7717/peerj.839 (PMC4393806; doi:10.7717/peerj.839)
Supplement: Supplemental Information 1 [file peerj-03-839-s001.xlsx]

## Sheet: Data set PEERJ
ID	Age	Age_Illicit	Age_Opioid	Duration_Opiate	Duration_Addiction	Duration_Illicit	Duration_MMT	Dose_MMT	Sows_Average	Income	Toler_0	Toler_24	Pain_Trough	Trough_Pain_37.53	PSQI_Total
A001	44	22	22	22	22	21	0.83	75	8	800	48.09	13.35	30.72	sensitive	7
A002	41	21	29	12	12	20	0.33	75	13	700	25.36	20.47	22.92	sensitive	3
A003	39	19	19	20	20	16	4	50	4	1500	18.55	14.56	16.56	sensitive	4
A004	54	24	27	27	27	27	3	100	1	1500	21.11	26.1	23.61	sensitive	4
A005	51	19	19	32	30	27	5	85	6	800	26.8	30.88	28.84	sensitive	10
A006	39	21	21	18	18	13	5	70	11	500	18.97	21.17	20.07	sensitive	7
A007	46	22	22	24	24	20	4	75	1	1200	70.36	54.94	62.65	tolerant	4
A008	37								7		19.42	15.73	17.58	sensitive
A009	31	22	23	8	8	4	3	100	1	1700	35.46	47.59	41.53	tolerant	3
A010	31	22	22	9	8	4	5	80	1	1600	28.81	36.58	32.7	sensitive	4
A011	29	21	21	8	7	5	3	120	1	900	30.28	29.54	29.91	sensitive	4
A012	40	18	18	22	22	17	5	40	1	800	22.28	35.59	28.94	sensitive	4
A013	34	20	22	12	12	9	5	50	10	1100	70.91	30.63	50.77	tolerant	5
A014	46	20	30	16	15	25	1	40	1	2000	131.17	111.75	121.46	tolerant	6
A015	30	15	15	15	14	14	0.58	75	0	1200	33.52	24.52	29.02	sensitive	4
A016	48	20	25	23	23	27	1	75	0	1200	29.09	29.64	29.37	sensitive	4
A017	37	18	19	18	17	15	3	150	1	300	46.8	34.01	40.41	tolerant	5
A018	40	21	25	15	15	16	3	120	0	900	113.49	209.91	161.7	tolerant	4
A019	39	18	20	19	19	16	5	30	2	1200	24.81	35.87	30.34	sensitive	4
A020	32	22	25	7	7	7	3	75	7	1500	81.98	42.65	62.32	tolerant	2
A021	33	14	18	15	15	18	1	75	9	800	29.03	9999	29.03	sensitive	10
A022	40	25	30	10	10	6	9	60	2	1500	25.91	34.8	30.35	sensitive	5
A023	33	15	15	18	18	10	8	75	6	0	17.48	19.24	18.36	sensitive	12
A024	34								9		122.95	48.4	85.68	tolerant
A025	33								3		34.85	22.75	28.8	sensitive
A026	36	30	30	6	5	4	2	80	0	600	110.37	22.83	66.6	tolerant	3
A027	36	15	15	21	20	20	1	50	0	0	55.81	47.69	51.75	tolerant	8
A028	28	17	23	5	5	9	2	75	4	0	93.85	9999	93.85	tolerant	4
A029	44	25	30	14	14	17	2	100	10	500	7.88	15.23	11.56	sensitive	2
A030	29	19	25	4	4	8	1.33	75	4	400	16.88	16.17	16.53	sensitive	12
A031	46	16	16	30	30	29	0.83	75	0	1500	30.02	16.13	23.08	sensitive	6
A032	40	22	23	17	17	16	1.5	75	4	800	42.16	11.2	26.68	sensitive	5
A033	34	16	25	9	9	9	9	100	8	500	45.01	19.56	32.29	sensitive	3
A034	27	21	26	1	1	5	1	100	0	2000	10.15	45.16	27.65	sensitive	5
A035	35	16	21	14	11	18	0.42	25	0	1200	57.44	17.59	37.52	sensitive	6
A036	53	18	20	33	33	34	0.5	50	0	1500	54.88	28.87	41.88	tolerant	7
A037	39	13	16	23	23	25	1	100	3	800	50.69	25.06	37.88	tolerant	6
A038	48	22	27	21	21	25	1	65	5	0	25.76	24.06	24.91	sensitive	5
A039	25	17	17	8	8	5	3	50	22	1000	8.6	7.59	8.09	sensitive	6
A040	34	19	20	14	14	9	6	70	3	950	97.93	25.37	61.65	tolerant	10
A041	40	20	32	8	8	18	2	50	2	1200	56	19.85	37.93	tolerant	6
A042	52	15	19	33	33	33	4	110	0	0	10.47	14.7	12.59	sensitive	3
A043	37	21	23	14	14	13	3	70	3	700	18.11	15.66	16.88	sensitive	14
A044	36	14	17	19	19	15	5.8	100	3	800	21.27	16.58	18.92	sensitive	7
A045	42	20	24	18	18	19	3	30	2	1000	16.41	12.93	14.67	sensitive	5
A046	37	12	17	20	20	24	0.5	70	2	0	23.3	12.31	17.81	sensitive	9
A047	30	15	23	7	7	14	1.17	70	6	1500	31.14	12.51	21.83	sensitive	8
A048	39	16	24	15	15	20	2.67	90	1	500	22.09	25.18	23.63	sensitive	4
A049	36	21	21	15	15	14	1.33	50	6	700	33.91	36.04	34.97	sensitive	4
A050	37	17	19	18	13	17	2.5	95	1	1200	47.87	35.59	41.73	tolerant	4
A051	48	17	28	20	13	30	0.5	50	6	0	34.61	23.61	29.11	sensitive	5
A052	48	30	35	13	13	15	3	60	1	1000	23.58	32.68	28.13	sensitive	9
A053	33	16	16	17	13	16	0.67	100	10	1000	33.6	15	24.3	sensitive	12
A054	35	18	31	4	4	16	1	75	0	1000	20.22	16.56	18.39	sensitive	8
A055	35	20	22	13	8	14	1	75	0	1000	39.73	45.5	42.61	tolerant	6
A056	37	14	17	20	13	22	1	50	0	2000	38.78	44.77	41.78	tolerant	3
A057	39	19	23	16	16	19	0.5	100	5	3000	26.91	10.48	18.7	sensitive	5
A058	25	17	24	1	1	7	1	70	2	1200	67.68	29.05	48.37	tolerant	2
A059	31	21	21	10	10	9	1	100	10	500	18	10.61	14.31	sensitive	6
A060	27	16	24	3	3	10	0.58	75	1	900	23.87	16.7	20.29	sensitive	4
A061	46	17	19	27	27	27	2	100	1	1000	23.4	28.7	26.05	sensitive	4
A062	39	14	16	23	23	21	4	50	1	1200	19.67	25.64	22.66	sensitive	8
A063	38	17	20	18	18	20	0.58	70	4	1000	29.5	26.61	28.06	sensitive	5
A064	45	20	20	25	25	22	3	100	1	0	18.99	24.97	21.98	sensitive	7
A065	44	15	15	29	27	22	7	50	1	700	28.2	24.93	26.56	sensitive	4
A066	35	16	18	17	17	18	1	100	2	600	39.46	34.39	36.93	sensitive	6
A067	38	33	33	5	5	4	1.33	100	1	300	48.34	65.17	56.76	tolerant	3
A068	35	15	17	18	16	15	5	65	4	800	39.71	34.05	36.88	sensitive	7
A069	36	13	21	15	15	22	0.83	120	4	1200	38.41	29.66	34.04	sensitive	9
A070	30	26	26	4	4	3	1.17	75	1	600	57.94	23.37	40.66	tolerant	3
A071	29	12	12	17	17	16	1.25	40	0	800	60.88	54.64	57.76	tolerant	3
A072	32	22	27	5	5	9	1.33	30	2	800	20.02	25.37	22.7	sensitive	4
A073	39	21	21	18	16	14	4	35	4	900	54.75	34.59	44.67	tolerant	4
A074	42	24	24	18	18	17	1.25	100	3	700	15.88	14.91	15.4	sensitive	3
A076	28	18	18	10	10	2	8	360	10	900	22.94	17.63	20.29	sensitive	10
A077	32	14	17	15	15	13	5	70	18	450	15.28	11.58	13.43	sensitive	8
A078	43	20	25	18	18	17	6	125	8	1000	3.5	10.65	7.08	sensitive	6
A079	36	26	29	7	7	7	3	85	1	1500	13.84	10.31	12.08	sensitive	4
A080	55	19	30	25	25	33	3	40	3	800	19.44	20.72	20.08	sensitive	7
A081	39	18	20	19	18	16	5	70	4	800	32.57	13.31	22.94	sensitive	5
A082	37	13	18	19	16	22	2	100	26	800	15.09	19.03	17.06	sensitive	10
A083	36	16	20	16	16	19	1.17	160	1	900	19.59	19.66	19.63	sensitive	6
A084	33	32	32	1	0.5	0.5	0.5	55	8	600	39.38	42.31	40.85	tolerant	4
A085	35	14	14	21	17	15	6	90	6	0	16.88	17.94	17.41	sensitive	12
A086	33	25	27	6	6	4	4	40	1	300	16.25	12.75	14.5	sensitive	3
A087	34	19	25	9	9	13	2.08	100	0	700	15	7.81	11.41	sensitive	2
A088	41	19	19	22	22	21	1.08	50	1	600	57.66	16.76	37.21	sensitive	9
A089	39	12	13	26	26	24	3	145	0	1200	287.51	300	293.76	tolerant	0
A090	28	18	24	4	2	9	1.25	55	1	2000	147.44	58.06	102.75	tolerant	1
A091	35	25	30	5	5	10	0.5	100	5	650	15.54	10.1	12.82	sensitive	5
A092	51	20	20	31	27	27	4	160	0	800	39.5	10.5	25	sensitive	5
A093	40	15	21	19	8	21	3.75	50	0	1200	27.81	16.87	22.34	sensitive	6
A094	34	23	23	11	11	8	3	50	10	800	14.56	6.88	10.72	sensitive	11
A095	30	18	25	5	5	7	5	65	1	600	19.53	7.37	13.45	sensitive	10
A096	29	23	25	4	2	5	1.17	35	3	800	36.67	25.18	30.93	sensitive	5
A097	40	18	20	20	20	17	5	40	1	1000	13.44	12.06	12.75	sensitive	13
A098	33	14	15	18	17	14	5	90	4	700	30.29	11.68	20.99	sensitive	5
A099	38	20	25	13	13	17	1.33	45	1	800	23.82	13.56	18.69	sensitive	4
A100	34	17	17	17	16	15	1.5	120	2	700	45.93	26.94	36.44	sensitive	6
A101	33	25	26	7	7	7	1.33	50	2	800	53.29	15.15	34.22	sensitive	5
A102	44	28	30	14	13	12	4	35	1	1000	20.02	49.35	34.69	sensitive	3
A103	29	19	21	8	8	9	1.42	50	1	1600	8.07	32.37	20.22	sensitive	3
A104	29	15	15	14	14	12	2.25	45	5	0	21.47	17.97	19.72	sensitive	2
A105	42	19	21	21	21	17	6	150	0	800	13.19	11.09	12.14	sensitive	1
A106	30	21	21	9	9	8	0.66	75	12	700	16.31	15.75	16.03	sensitive	5
A107	32	15	15	17	15	16	1	120	25	0	36.18	21.04	28.61	sensitive	6
A108	41	15	20	21	20	25	1.25	100	2	900	12.12	13.86	12.99	sensitive	10
A109	46	32	41	5	4	13	1.25	20	7	1500	31.03	21.28	26.16	sensitive	1
A110	47	15	15	32	32	29	3	40	14	450	19.03	17.76	18.4	sensitive	8
A111	48	18	20	28	28	28	2	120	9	500	21.9	9.66	15.78	sensitive	6
A112	43	29	29	14	14	11	3	60	3	800	22.13	8.82	15.48	sensitive	9
A113	42	20	26	16	16	21	0.5	100	2	0	23.16	9999	23.16	sensitive	5
A114	39	17	23	16	16	19	3	75	1	1000	58.59	54.73	56.66	tolerant	4
A115	45	24	26	19	19	15	6	85	7	700	13.74	17.28	15.51	sensitive	4
A116	28	24	27	1	1	3	0.67	100	3	600	29.64	29.88	29.76	sensitive	2
A117	31	15	21	10	10	15	1.33	75	8	500	17.5	11.12	14.31	sensitive	9
A118	31	25	25	6	6	2	4	50	0	500	300	300	300	tolerant	6
A119	40	17	21	19	10	20	3	30	2	800	14.03	14.1	14.07	sensitive	3
A120	32	16	20	12	12	14	2.17	60	2	0	18.88	18.21	18.55	sensitive	6
A121	30	20	20	10	10	8	2	60	2	400	19.25	26.35	22.8	sensitive	7
A122	39	19	21	18	18	12	8	55	3	800	18.09	18.91	18.5	sensitive	4
A123	37	13	16	21	21	16	8	90	9	900	14.97	20.69	17.83	sensitive	8
A124	41	25	28	13	13	13	3	130	16	800	92.16	14.03	53.1	tolerant	4
A125	38	22	26	12	12	12	4	80	3	800	52.53	17.66	35.1	sensitive	5
A126	36	26	28	8	8	8	2	90	5	1200	63.29	21.05	42.17	tolerant	4
A127	37	22	23	14	13	8	7	60	2	900	18.88	9.47	14.18	sensitive	3
A128	34	24	25	9	9	3	7	75	1	1000	18.15	24.56	21.35	sensitive	4
A129	29	21	21	8	7	7	1	100	1	1100	76.69	32.19	54.44	tolerant	5
A130	44	23	25	19	19	15	6	45	11	750	45	35.9	40.45	tolerant	3
A131	36	15	28	8	8	16	5	85	6	900	25.56	15.04	20.3	sensitive	3
A132	38	25	25	13	12	12	1	50	4	800	20.06	23.59	21.83	sensitive	6
A133	33	18	19	14	14	9	6	130	3	0	15.16	8.44	11.8	sensitive	4
A134	43	20	25	18	18	18	5	45	6	0	15.28	18.78	17.03	sensitive	5
A135	42	18	18	24	24	22	2	100	0	900	36.91	20.46	28.69	sensitive	3
A136	37	17	22	15	15	17	3	50	5	1000	57.75	30.59	44.17	tolerant	4
A137	33	15	17	16	14	16	2	65	17	780	25.88	21.47	23.67	sensitive	6
A138	32	15	15	17	17	15	2	50	1	800	22.77	16.66	19.72	sensitive	5
A139	32	20	28	4	4	7	5	90	20	0	34.72	14.4	24.56	sensitive	4
A140	34	19	20	14	14	10	5	30	3	1000	26.03	14.68	20.36	sensitive	9
A141	32	16	19	13	13	11	5	50	15	700	17.1	24.32	20.71	sensitive	9
A142	45	23	24	21	21	17	5	35	1	1000	17.31	18.25	17.78	sensitive	4
A143	34	19	22	12	12	13	2	120	11	1000	10.81	13.34	12.08	sensitive	5
A144	28	20	20	8	8	6	2	100	1	0	18.28	16.06	17.17	sensitive	2
A145	36	18	23	13	13	15	3	75	14	1300	17.34	22.51	19.93	sensitive	9
A146	38	21	24	14	13	10	7	50	11	1000	23.13	19.41	21.27	sensitive	4
A147	50	22	24	26	26	26	2	80	1	1200	14.25	8.41	11.33	sensitive	7
A148	38	15	27	11	10	15	8	60	5	600	17.66	10.97	14.32	sensitive	7
A149	29	17	22	7	6	11	1	60	2	1500	22.62	19.97	21.3	sensitive	6
A150	37	19	20	17	17	15	3	120	2	600	57.66	36.21	46.94	tolerant	8
A151	37	16	21	16	16	15	6	185	2	1000	10.54	10.47	10.5	sensitive	10
A152	39	15	21	18	18	19	5	50	1	600	15.96	15.81	15.89	sensitive	7
A153	40	15	18	22	21	24	1.33	70	2	800	35.3	26.77	31.03	sensitive	3
A154	30	14	14	16	16	14	2	85	1	400	44.36	21.37	32.87	sensitive	4
A155	43	22	24	19	19	17	4	60	5	700	21.16	14.22	17.69	sensitive	5
A156	41	19	25	16	6	20	2.33	50	2	1500	27.35	20.81	24.08	sensitive	4
A157	31	13	13	18	18	17	1.58	30	4	800	23.06	12.72	17.89	sensitive	10
A158	37	17	20	17	17	17	3	95	1	0	19.41	12.72	16.07	sensitive	3
A159	43	23	23	20	19	19	1.25	50	2	1200	16.88	16.04	16.46	sensitive	6
A160	35	17	17	18	18	17	1	60	2	1000	13.53	10.69	12.11	sensitive	5
A161	48	25	35	13	13	21	2	40	4	1500	30.22	36.57	33.39	sensitive	5
A162	43	18	24	19	18	23	2	40	0	1500	13.16	9999	13.16	sensitive	3
A163	34	21	24	10	10	12	1.33	50	14	800	40	32.03	36.02	sensitive	12
A164	31	17	22	9	6	12	2	90	1	900	20.44	19.12	19.78	sensitive	2
A165	35	19	19	16	16	13	3	90	0	900	21.19	16.35	18.77	sensitive	1
A166	34	18	23	11	9	11	5	140	1	500	32.15	48.48	40.32	tolerant	0
A167	36	17	18	18	3	19	0.67	50	1	900	41.91	9999	41.91	tolerant	7
A168	39	23	23	16	16	10	6	80	1	1000	17.29	13.37	15.33	sensitive	7
